# Supplementary material for: Networks of High Mutual Information Define the Structural Proximity of Catalytic Sites: Implications for Catalytic Residue Identification
Source: PLoS Comput Biol. 2010 Nov 4;6(11):e1000978. doi: 10.1371/journal.pcbi.1000978 (PMC2973806; doi:10.1371/journal.pcbi.1000978)
Supplement: Table S2 — Performance details of all methods included in the analysis. Cons and C means conservation; pMI: proximity MI; pC: proximity conservation, Cls: catalytic likeliness score; Nseq: number of sequences; Ncluster:number of clusters; pdb: pdb taken as reference. (0.16 MB XLS) [file pcbi.1000978.s003.xls]

## Sheet: Perf
PF	Cons	Cons AUC0.1	pMI	pMI AUC0.1	pC	pC AUC0.1	c+pMI	c+pMI AUC0.1	c+pC	c+pC AUC0.1	c+pC+pMI	c+pC+pMI AUC0.1	Nseq	Ncluster	PDB
PF00004	1	0.90909	0.42424	0	0.78788	0	0.87879	0	0.90909	0	0.90909	0	12398	1017	1nsf;XRAY
PF00006	0.26824	0	0.47059	0	0.39412	0	0.32118	0	0.22706	0	0.27412	0	23	12	1lws;XRAY
PF00009	0.94271	0.41667	0.31771	0	0.99479	0.9375	0.79167	0	0.97917	0.78125	0.95312	0.52083	15518	2069	1d8t;XRAY
PF00012	0.94667	0.45333	0.928	0.26667	0.872	0	0.96267	0.61333	0.93867	0.37333	0.94667	0.45333	3034	518	1kaz;XRAY
PF00016	0.83278	0.28053	0.5088	0	0.85589	0.24752	0.76238	0.16502	0.92519	0.33003	0.85974	0.26953	19930	1032	1rbl;XRAY
PF00026	0.96661	0.64332	0.9487	0.46417	0.98046	0.78176	0.9886	0.86319	0.98371	0.81433	0.99104	0.88762	1487	696	1am5;XRAY
PF00036	0.54545	0	0.72727	0	0.22727	0	0.59091	0	0.22727	0	0.5	0	12833	2339	1qv0;XRAY
PF00044	1	0.94203	0.68841	0	1	0.94203	1	0.94203	1	0.94203	1	0.94203	3541	494	1cf2;XRAY
PF00062	0.704	0	0.78	0	0.824	0.12	0.8	0	0.808	0	0.804	0	369	78	2eql;XRAY
PF00064	0.83505	0	0.76546	0	0.96521	0.63144	0.85438	0	0.9433	0.41237	0.92655	0.24485	6692	67	1a4g;XRAY
PF00067	0.99015	0.90152	0.83864	0.27273	0.90303	0.30303	0.98864	0.88636	0.99015	0.90152	0.98561	0.85606	6101	2852	1bu7;XRAY
PF00068	0.82778	0.05556	0.86667	0.27778	0.88056	0.36111	0.90278	0.30556	0.87778	0.27778	0.925	0.33333	37	21	1n29;XRAY
PF00069	0.96067	0.58052	0.35393	0	0.99251	0.89888	0.97004	0.67416	0.98689	0.8427	0.99438	0.9176	25964	9884	2phk;XRAY
PF00074	0.91014	0.28986	0.89275	0.31884	0.95072	0.46377	0.93913	0.34783	0.94203	0.55072	0.95652	0.52174	394	48	2rnf;XRAY
PF00075	0.94286	0.42857	0.97143	0.71429	0.94286	0.42857	0.97857	0.78571	0.97857	0.78571	0.97857	0.78571	4650	556	1rdd;XRAY
PF00077	0.7957	0	0.96774	0.64516	0.64516	0	0.98387	0.80645	0.85484	0	0.96237	0.5914	53767	249	1a30;XRAY
PF00080	0.96026	0.59603	0.6755	0	0.96026	0.59603	0.90728	0.36424	0.96026	0.59603	0.94371	0.49669	978	319	2jcw;XRAY
PF00082	0.99481	0.92088	0.77691	0.16861	0.97665	0.7393	0.98833	0.85603	0.99351	0.90791	0.99092	0.88197	2797	1325	1sca;XRAY
PF00085	0.93029	0.43269	0.98077	0.76923	0.97596	0.72115	0.97596	0.72115	0.98077	0.76923	0.98558	0.81731	4804	1859	1mek;NMR
PF00089	0.91865	0.58201	0.90542	0.37037	0.91138	0.26455	0.96627	0.74074	0.94643	0.65476	0.97288	0.75397	6437	3057	1ddj;XRAY
PF00102	0.84657	0.23605	0.87876	0.26824	0.90773	0.07511	0.90129	0.36481	0.87661	0.26824	0.90343	0.2897	1421	448	1bzc;XRAY
PF00106	0.98933	0.8689	0.74085	0.06098	0.83079	0.01524	0.99238	0.89939	0.97866	0.7622	0.9878	0.85366	23001	9736	1ybv;XRAY
PF00109	1	0.98361	0.68852	0	0.9959	0.94262	1	0.98361	1	0.98361	1	0.98361	5655	1986	1dd8;XRAY
PF00112	0.96729	0.65421	0.60592	0	0.92212	0.62305	0.96417	0.62305	0.98287	0.80997	0.99221	0.90343	2193	734	8pch;XRAY
PF00115	0.7121	0.16342	0.42106	0	0.70009	0.11197	0.66267	0.13417	0.71573	0.20276	0.71896	0.1614	14394	2236	1fft;XRAY
PF00117	0.99113	0.86879	0.88298	0.08865	0.94504	0.47872	0.99823	0.93972	0.98936	0.85106	0.99291	0.88652	5413	1380	1qdl;XRAY
PF00118	0.99381	0.92784	0.91289	0.35052	0.97165	0.70619	0.99433	0.93299	0.99433	0.93299	0.99381	0.92784	2904	464	1a6d;XRAY
PF00119	0.8753	0.38369	0.85851	0.26379	0.92566	0.35971	0.95923	0.55156	0.94245	0.57554	0.95683	0.59952	6508	540	1c17;NMR
PF00121	0.95726	0.55556	0.9265	0.26496	0.97009	0.68376	0.96752	0.65812	0.97692	0.75214	0.97692	0.75214	1475	459	1hti;XRAY
PF00127	0.96809	0.6383	0.75532	0	0.8617	0	0.96809	0.6383	0.97872	0.74468	0.97872	0.74468	471	236	2b3i;NMR
PF00135	0.95043	0.49569	0.74066	0	0.77945	0.14368	0.91882	0.43103	0.92601	0.4023	0.91092	0.4023	1456	805	1qe3;XRAY
PF00141	0.96118	0.57564	0.83266	0.22758	0.7925	0.04016	0.96519	0.6158	0.94645	0.44177	0.96252	0.58902	2485	429	7atj;XRAY
PF00144	0.87397	0.71233	0.91562	0.41096	0.87726	0.33425	0.90411	0.75068	0.88329	0.69589	0.90575	0.76712	3880	1774	1ci8;XRAY
PF00145	0.99023	0.87948	0.99674	0.94463	0.98534	0.83062	0.99837	0.96091	0.99674	0.94463	0.99674	0.94463	701	527	1mht;XRAY
PF00149	0.85758	0.59091	0.75909	0	0.96364	0.63636	0.88485	0.45455	0.92879	0.5	0.93485	0.5303	8694	4140	1ush;XRAY
PF00150	0.98561	0.79137	0.7554	0	0.91367	0.07194	0.97842	0.71942	0.99281	0.86331	0.97842	0.71942	1003	505	1cz1;XRAY
PF00151	0.92169	0.51958	0.95105	0.54217	0.85542	0.37651	0.95934	0.58735	0.92696	0.48946	0.9503	0.49699	319	154	1hpl;XRAY
PF00155	0.99391	0.93124	0.98259	0.8181	0.95213	0.51349	0.99739	0.96606	0.99565	0.94865	0.99478	0.93995	9367	3896	1b8g;XRAY
PF00156	0.91214	0.62016	0.95607	0.49096	0.91731	0.10336	0.97674	0.69767	0.97674	0.69767	0.97674	0.69767	6429	1788	1bzy;XRAY
PF00161	0.98387	0.80645	0.9879	0.84677	0.99798	0.94758	0.99194	0.8871	0.9879	0.84677	0.99597	0.92742	18	13	1abr;XRAY
PF00162	0.9136	0.21446	0.97549	0.73529	0.94118	0.44118	0.96814	0.66176	0.96998	0.68015	0.9663	0.64338	1167	221	13pk;XRAY
PF00171	0.97325	0.7303	0.94939	0.49168	0.98626	0.86045	0.99349	0.93275	0.98482	0.84599	0.99422	0.93999	7767	2505	1a4s;XRAY
PF00175	1	0.98214	0.90179	0	0.99107	0.89286	1	0.98214	1	0.98214	1	0.98214	4235	1598	1amo;XRAY
PF00180	0.98551	0.84058	0.90821	0.37681	0.83865	0.00966	0.99227	0.90821	0.96618	0.64734	0.98937	0.87923	2347	371	1a05;XRAY
PF00182	0.75036	0	0.48763	0	0.83261	0.48035	0.67394	0	0.82824	0	0.76856	0	538	164	1cns;XRAY
PF00186	0.78524	0.07569	0.68874	0.20814	0.8316	0.17029	0.81552	0.14191	0.83538	0.13245	0.86471	0.16083	1175	345	1ra2;XRAY
PF00194	0.92885	0.27668	0.99209	0.90909	0.99209	0.90909	0.96443	0.63241	0.97036	0.6917	0.97628	0.75099	508	223	1ca3;XRAY
PF00202	0.98516	0.83086	0.78536	0.07913	0.86152	0.30663	0.98318	0.81108	0.98417	0.82097	0.98615	0.84075	4536	1221	1d7r;XRAY
PF00205	0.67407	0	0.94815	0.44444	0.6	0	0.94074	0.37037	0.60741	0	0.91111	0.07407	2971	798	1bfd;XRAY
PF00206	0.97909	0.77273	0.73818	0	0.95636	0.63636	0.96455	0.62727	0.98455	0.82727	0.98455	0.82727	3052	628	1c3c;XRAY
PF00211	0.94798	0.46243	0.69364	0	0.85549	0	0.90173	0	0.9711	0.69364	0.90173	0	2043	786	1ab8;XRAY
PF00215	0.99556	0.93333	0.96889	0.66667	0.97333	0.71111	1	0.97778	0.99778	0.95556	1	0.97778	1243	387	1dbt;XRAY
PF00221	0.92377	0.31263	0.9773	0.75803	0.94347	0.42398	0.99015	0.88651	0.97302	0.7152	0.98458	0.83084	735	161	1b8f;XRAY
PF00225	0.89623	0	1	0.97484	0.99686	0.9434	0.98742	0.84906	0.96541	0.62893	0.99057	0.8805	2019	597	1goj;XRAY
PF00232	0.92905	0.28825	0.95565	0.55432	0.88581	0.43237	0.97894	0.78714	0.95455	0.54324	0.97228	0.72062	1460	424	1pbg;XRAY
PF00245	0.97407	0.7284	0.98642	0.85185	0.94568	0.44444	0.98889	0.87654	0.98642	0.85185	0.98519	0.83951	551	175	1alk;XRAY
PF00246	0.88267	0.1444	0.8917	0	0.87906	0.45126	0.93321	0.30686	0.92419	0.21661	0.94224	0.39711	980	470	1cbx;XRAY
PF00248	0.95906	0.61988	0.72982	0	0.9848	0.83041	0.96491	0.63158	0.98129	0.79532	0.98246	0.80702	4543	1701	2acu;XRAY
PF00254	0.8913	0.32609	0.78623	0.03623	0.9058	0.14493	0.89493	0.47101	0.93116	0.36232	0.93116	0.54348	3358	1001	1d6o;XRAY
PF00255	0.97807	0.74561	0.9386	0.35088	0.9386	0.35088	0.97368	0.70175	0.97368	0.70175	0.98246	0.78947	12	9	1gp1;XRAY
PF00264	0.32536	0	0.73684	0	0.51675	0	0.57895	0	0.50718	0	0.53589	0	634	279	1bt1;XRAY
PF00266	0.73611	0.61111	0.96019	0.60185	0.88148	0.50926	0.95463	0.64815	0.90556	0.63889	0.96296	0.62963	3966	1565	1qz9;XRAY
PF00274	0.95101	0.48991	0.99135	0.89337	0.98751	0.85495	0.99328	0.91258	0.98079	0.7877	0.99424	0.92219	473	137	1ald;XRAY
PF00275	0.7733	0	0.95592	0.59194	0.97355	0.71788	0.94521	0.43451	0.94584	0.44081	0.95466	0.52897	1915	437	1uae;XRAY
PF00285	0.97312	0.72581	0.95766	0.57124	0.97715	0.76613	0.9879	0.87366	0.99194	0.91398	0.99328	0.92742	1620	334	1al6;XRAY
PF00288	0.82759	0	0.93103	0.17241	0.81034	0	0.93103	0.17241	0.84483	0	0.89655	0	2770	654	1oj4;XRAY
PF00290	0.97778	0.77778	0.90139	0.30556	0.89444	0.27778	0.96528	0.65278	0.97083	0.70833	0.96944	0.69444	937	254	1geq;XRAY
PF00291	0.89897	0.49658	0.87329	0.23973	0.88014	0.2226	0.92295	0.49658	0.92808	0.49658	0.93322	0.49658	5842	1505	1oas;XRAY
PF00293	0.50752	0	0.85714	0.37594	0.57895	0	0.74436	0	0.65038	0	0.79323	0	7631	3577	1mqw;XRAY
PF00294	0.99141	0.91065	0.82388	0.01718	1	0.99656	0.98969	0.89347	0.99742	0.97079	0.99656	0.9622	3657	1678	1rk2;XRAY
PF00295	0.97691	0.75637	0.98726	0.85987	0.99283	0.91561	0.9992	0.9793	0.9992	0.9793	0.9992	0.9793	814	288	1czf;XRAY
PF00300	0.99044	0.88798	0.97541	0.7377	0.96448	0.62842	0.99863	0.96995	0.9959	0.94262	0.99727	0.95628	3730	1753	1qhf;XRAY
PF00302	0.9736	0.72607	0.98185	0.80858	0.9769	0.75908	0.98845	0.87459	0.9835	0.82508	0.99505	0.94059	178	68	3cla;XRAY
PF00303	0.89781	0.48662	0.91363	0.43796	0.95134	0.52311	0.93066	0.55961	0.92092	0.55961	0.94404	0.59611	832	116	1b02;XRAY
PF00310	0.97785	0.72785	0.84494	0	1	0.94937	0.97468	0.6962	0.99051	0.85443	0.99367	0.88608	3778	1361	1ct9;XRAY
PF00311	0.73983	0.37818	0.98708	0.86279	0.96959	0.68795	0.93463	0.57393	0.92854	0.57773	0.94641	0.60053	557	139	1qb4;XRAY
PF00316	0.919	0.45691	0.97196	0.71651	0.92731	0.30114	0.97196	0.71651	0.93977	0.3946	0.96781	0.67497	607	153	1eyi;XRAY
PF00326	0.99776	0.96413	0.96263	0.61286	0.90135	0.29895	1	0.98655	0.99851	0.9716	1	0.98655	70	51	1qfm;XRAY
PF00328	0.99374	0.92719	0.98066	0.79636	0.97952	0.78498	0.99659	0.95563	0.99374	0.92719	0.99716	0.96132	812	377	1rpt;XRAY
PF00331	0.9644	0.61489	0.98058	0.7767	0.95793	0.55016	0.9644	0.61489	0.95793	0.55016	0.96764	0.64725	424	207	2his;XRAY
PF00332	0.94619	0.4553	0.76656	0	0.83361	0.09934	0.94702	0.46358	0.96275	0.62086	0.94868	0.48013	735	278	1aq0;XRAY
PF00334	0.9798	0.78283	0.90909	0.30303	0.90152	0.32828	0.98485	0.83333	0.9899	0.88384	0.98485	0.83333	1178	209	1nsp;XRAY
PF00342	0.96972	0.68489	0.95297	0.57319	0.92975	0.44974	0.9759	0.74662	0.97825	0.77014	0.97296	0.71723	1078	236	1dqr;XRAY
PF00343	0.92168	0.38811	0.98636	0.85664	0.9507	0.5	0.97727	0.76573	0.96189	0.61189	0.97622	0.75524	757	249	1gpa;XRAY
PF00348	0.97232	0.71956	0.70664	0	0.97048	0.70111	0.95572	0.55351	0.97601	0.75646	0.97232	0.71956	2340	832	1fps;XRAY
PF00349	0.75667	0.36667	0.97333	0.73333	0.96667	0.66667	0.91	0.65	0.89	0.55	0.94	0.63333	467	119	1ig8;XRAY
PF00355	0.9703	0.69307	0.76238	0	0.9802	0.79208	0.9703	0.69307	0.9802	0.79208	0.9901	0.89109	3895	1833	1ndo;XRAY
PF00358	0.96318	0.56202	0.75194	0	0.97868	0.71705	0.97287	0.65891	0.9845	0.77519	0.98837	0.81395	882	278	1gpr;XRAY
PF00365	0.93579	0.35424	0.97343	0.73063	0.91956	0.59779	0.98155	0.81181	0.9786	0.78229	0.98303	0.82657	1128	346	1pfk;XRAY
PF00378	0.74581	0	0.97765	0.72626	0.45531	0	0.94413	0.39106	0.56145	0	0.87709	0.13966	6081	2217	1dci;XRAY
PF00383	0.96078	0.58824	0.64706	0	0.93137	0.29412	0.96078	0.58824	0.96078	0.58824	0.96078	0.58824	3157	972	1ctt;XRAY
PF00388	0.94301	0.38603	0.66176	0	0.82169	0.03676	0.91728	0.40441	0.9614	0.56985	0.96691	0.625	541	101	2plc;XRAY
PF00389	0.80449	0.49679	0.82212	0	0.79808	0	0.9359	0.49679	0.80929	0.49679	0.96635	0.65705	3170	1133	1psd;XRAY
PF00390	0.97683	0.73084	0.98574	0.81996	0.97326	0.69519	0.99109	0.87344	0.99109	0.87344	0.99287	0.89127	1344	110	1do8;XRAY
PF00398	0.95546	0.54598	0.90517	0.33046	0.93966	0.53161	0.95402	0.53161	0.96121	0.60345	0.96121	0.60345	1219	377	1qam;XRAY
PF00413	0.82468	0	0.92857	0.25974	0.86364	0	0.9026	0	0.92857	0.25974	0.91558	0.12987	60	8	1qib;XRAY
PF00445	0.94646	0.48359	0.95682	0.55268	0.98964	0.88083	0.97064	0.69085	0.97582	0.74266	0.98446	0.82902	1089	468	1bol;XRAY
PF00450	1	0.96552	0.97241	0.68966	0.93793	0.34483	1	0.96552	1	0.96552	1	0.96552	916	368	1bcr;XRAY
PF00457	0.91209	0.10989	0.93132	0.38462	0.90659	0.46703	0.92857	0.3022	0.93681	0.35714	0.93956	0.41209	305	69	1bvv;XRAY
PF00459	0.90753	0.51613	0.77957	0.23656	0.92258	0.30108	0.90753	0.5914	0.92796	0.52688	0.92366	0.60215	1971	973	1qgx;XRAY
PF00462	0.56349	0.03968	0.83333	0.35714	0.8254	0.2381	0.80952	0.07937	0.71032	0.03968	0.83333	0.11905	2468	641	1qfn;NMR
PF00463	0.97075	0.69311	0.93029	0.50481	0.94151	0.54487	0.96394	0.625	0.97917	0.77724	0.96875	0.67308	385	22	1f8m;XRAY
PF00464	0.9078	0.09752	0.93085	0.39894	0.97961	0.78014	0.95922	0.57624	0.96809	0.66489	0.97252	0.70922	1201	128	1dfo;XRAY
PF00479	0.9691	0.64607	1	0.95506	0.97191	0.67416	0.99438	0.89888	0.98876	0.8427	0.99438	0.89888	1069	273	1dpg;XRAY
PF00484	0.98137	0.80745	0.95031	0.49689	0.98447	0.83851	0.97516	0.74534	0.98137	0.80745	0.98758	0.86957	1112	331	1i6p;XRAY
PF00490	0.9014	0.03106	0.89441	0.15528	0.94798	0.69099	0.94022	0.39596	0.95342	0.52795	0.95652	0.55901	833	130	1h7o;XRAY
PF00491	0.97945	0.78767	0.97089	0.70205	0.93151	0.32534	0.98801	0.87329	0.98459	0.83904	0.9863	0.85616	1190	408	1cev;XRAY
PF00501	0.67247	0.2073	0.9063	0.38143	0.62106	0.14925	0.79519	0.38143	0.65755	0.23217	0.72388	0.29851	13193	5929	1lci;XRAY
PF00503	0.90916	0.3537	0.89068	0.07235	0.82717	0.04823	0.96704	0.6672	0.93087	0.47428	0.94534	0.47428	749	185	1bh2;XRAY
PF00521	0.61494	0	0.14368	0	0.76782	0	0.36092	0	0.67471	0	0.47471	0	1870	298	1am2;XRAY
PF00540	0.59016	0	0.54098	0	0.16393	0	0.57377	0	0.45902	0	0.7377	0	10998	716	1hiv;XRAY
PF00544	0.95169	0.48309	0.74396	0	0.64976	0	0.91304	0.09662	0.89372	0.12077	0.90097	0.09662	329	91	2pec;XRAY
PF00545	0.63736	0	0.76923	0.05495	0.88462	0.16484	0.71429	0	0.74176	0	0.74176	0	178	54	1de3;NMR
PF00548	0.95216	0.55556	0.87037	0.24691	0.85185	0.13889	0.9892	0.87963	0.95988	0.64815	0.97377	0.72531	1158	72	1cqq;XRAY
PF00550	0.9403	0.29851	0.91045	0	0.95522	0.44776	0.98507	0.74627	0.95522	0.44776	0.98507	0.74627	9154	4016	1f80;XRAY
PF00551	0.98588	0.81921	0.80791	0.08475	0.94774	0.43785	0.97034	0.66384	0.98729	0.83333	0.97458	0.70621	2646	777	1c2t;XRAY
PF00557	0.9895	0.86134	0.91387	0.29412	0.98739	0.84034	0.98739	0.84034	0.9937	0.90336	0.9895	0.86134	3549	1144	1a16;XRAY
PF00561	0.92686	0.49127	0.91594	0.26201	0.87555	0.37118	0.9476	0.46943	0.93122	0.43668	0.95197	0.52402	8328	4844	1cv2;XRAY
PF00565	0.90152	0.07576	0.94697	0.45455	0.70455	0	0.93561	0.34091	0.86742	0	0.92424	0.22727	917	502	1a2t;XRAY
PF00574	0.94124	0.44068	0.77966	0.29379	0.81243	0.53107	0.92994	0.50847	0.9774	0.73446	0.94011	0.57627	1635	291	1tyf;XRAY
PF00579	0.97491	0.71685	0.51613	0	0.94444	0.41219	0.93728	0.3405	0.98566	0.82437	0.95878	0.55556	2075	396	1d2r;XRAY
PF00583	0.4186	0.09302	0.58372	0.23256	0.4093	0	0.53023	0.25581	0.46046	0.02326	0.5186	0.23256	18052	8518	1b6b;XRAY
PF00587	0.94643	0.63095	0.4	0	0.94881	0.44048	0.78929	0.28571	0.97262	0.71429	0.89286	0.42857	4659	864	1ses;XRAY
PF00590	0.77994	0	0.72816	0	0.33657	0	0.77508	0.01618	0.68123	0	0.71359	0	3453	1286	1pjq;XRAY
PF00596	0.66474	0	0.87861	0.26012	0.50867	0.49133	0.7659	0.08671	0.53757	0.11561	0.67919	0.23121	1581	446	1fua;XRAY
PF00632	0.86025	0.33219	0.85223	0.64147	0.73769	0.40092	0.91982	0.61856	0.87171	0.42383	0.90034	0.61856	819	276	1c4z;XRAY
PF00633	0.58621	0	0.34483	0	0.75862	0	0.37931	0	0.68966	0	0.58621	0	3284	595	2abk;XRAY
PF00639	0.94771	0.62092	0.80719	0	0.96078	0.58824	0.94444	0.65359	0.96732	0.65359	0.98039	0.78431	1922	686	1nmw;NMR
PF00648	0.95777	0.55743	0.77703	0	0.84291	0.11824	0.90963	0.09291	0.93919	0.37162	0.92483	0.23649	450	189	1kfu;XRAY
PF00656	0.79405	0.71429	0.9131	0.5119	0.97857	0.78571	0.91309	0.71429	0.88095	0.7381	0.93214	0.7381	787	385	1nw9;XRAY
PF00657	0.99509	0.93252	0.79877	0.09816	0.96074	0.58896	0.99264	0.90798	0.99509	0.93252	0.99264	0.90798	2718	1423	1bwp;XRAY
PF00677	0.92771	0.24096	0.92169	0.18072	0.95181	0.48193	0.95181	0.48193	0.93976	0.36145	0.96386	0.60241	1682	536	1kzl;XRAY
PF00682	0.98828	0.85938	0.86719	0	0.9375	0.35156	0.98828	0.85938	0.98828	0.85938	0.98438	0.82031	2684	569	1nvm;XRAY
PF00685	0.98916	0.86721	0.9729	0.70461	0.89566	0.2981	0.99187	0.89431	0.9878	0.85366	0.99051	0.88076	846	485	1hy3;XRAY
PF00692	0.89496	0.16807	0.7437	0	0.97479	0.67227	0.88655	0.21008	0.90756	0.21008	0.93697	0.37815	1421	340	1dup;XRAY
PF00694	0.97692	0.76923	0.97692	0.76923	0.97692	0.76923	0.98462	0.84615	0.98462	0.84615	0.99231	0.92308	1587	183	1fgh;XRAY
PF00696	0.93261	0.51087	0.89022	0.1413	0.87935	0.34783	0.96087	0.61957	0.94022	0.55435	0.9587	0.58696	4452	997	1oh9;XRAY
PF00697	0.98469	0.81633	0.93367	0.48469	0.85204	0.28061	0.9898	0.86735	0.97959	0.76531	0.97959	0.76531	799	368	1nsj;XRAY
PF00698	0.99091	0.87879	0.93333	0.39394	0.97576	0.72727	0.99697	0.93939	0.99394	0.90909	1	0.9697	3178	1126	1mla;XRAY
PF00701	0.92334	0.30197	0.96167	0.59233	0.9698	0.67364	0.97909	0.76655	0.96051	0.58072	0.98606	0.83624	1808	654	1fdy;XRAY
PF00702	0.83684	0.61842	0.82632	0.11842	0.80132	0.36842	0.87895	0.61842	0.87632	0.64474	0.85658	0.59211	12782	6560	1qh9;XRAY
PF00704	0.9592	0.5816	0.81684	0	0.98438	0.83333	0.97569	0.74653	0.98264	0.81597	0.98438	0.83333	1621	735	1ctn;XRAY
PF00708	0.97895	0.73684	0.90526	0.26316	0.89474	0.05263	1	0.94737	0.97895	0.73684	0.97895	0.73684	875	448	2acy;XRAY
PF00709	0.95545	0.53302	0.98727	0.85123	0.96022	0.58075	0.99443	0.92283	0.99125	0.89101	0.99443	0.92283	959	172	1gim;XRAY
PF00710	0.95899	0.56782	0.86987	0.31546	0.78312	0.38644	0.93927	0.50473	0.92902	0.51262	0.92192	0.48896	786	223	1djo;XRAY
PF00716	0.95918	0.61224	0.97577	0.72704	0.94005	0.42092	0.99235	0.89286	0.98597	0.82908	0.98852	0.85459	85	35	1nkk;XRAY
PF00717	0.9641	0.5641	0.86154	0.25641	0.9641	0.61538	0.96923	0.61538	0.97949	0.71795	0.97949	0.71795	3228	976	1t7d;XRAY
PF00719	0.91304	0.1087	0.36957	0	0.96196	0.59783	0.86957	0	0.95652	0.54348	0.90761	0.05435	952	150	1wgi;XRAY
PF00722	0.98535	0.84249	0.90842	0.21978	0.96703	0.65934	0.98901	0.87912	0.99267	0.91575	0.99451	0.93407	999	446	2ayh;XRAY
PF00723	0.97458	0.7385	0.95763	0.56901	0.96852	0.67797	0.99031	0.89588	0.99274	0.9201	0.98789	0.87167	444	186	1agm;XRAY
PF00724	0.91619	0.39398	0.88324	0.23639	0.81519	0.17192	0.97994	0.77364	0.90544	0.35817	0.96777	0.65186	2245	901	1bwl;XRAY
PF00725	0.86598	0	0.47423	0	0.73196	0	0.87629	0	0.84536	0	0.83505	0	2127	634	2hdh;XRAY
PF00730	0.76923	0.48951	0.90559	0.38462	0.61538	0	0.95455	0.52448	0.79371	0.45455	0.89161	0.45455	2970	825	1diz;XRAY
PF00749	0.9582	0.57878	0.83601	0	0.90997	0.09646	0.94855	0.48232	0.97106	0.7074	0.95498	0.54662	1810	407	1j09;XRAY
PF00753	0.98148	0.80247	0.50617	0	1	0.98765	0.97531	0.74074	0.99383	0.92593	0.98765	0.8642	8191	3708	1qh5;XRAY
PF00755	0.89864	0.25128	0.91865	0.5494	0.88416	0.41738	0.91823	0.35775	0.9029	0.31942	0.91354	0.4046	286	112	1q6x;XRAY
PF00759	0.9652	0.64965	0.99536	0.95128	0.94432	0.58778	0.98763	0.87394	0.98917	0.8894	0.98763	0.87394	514	183	1js4;XRAY
PF00762	0.97492	0.721	0.98015	0.77325	0.99269	0.89864	0.99164	0.88819	0.98851	0.85684	0.99478	0.91954	781	213	1hrk;XRAY
PF00770	0.92807	0.50978	0.84916	0.36313	0.94134	0.44693	0.92598	0.62849	0.96788	0.62849	0.94972	0.62849	66	15	1nln;XRAY
PF00793	1	0.98425	0.87008	0	0.74016	0	0.99606	0.94488	1	0.98425	0.99606	0.94488	1634	199	1q3n;XRAY
PF00795	0.99824	0.93474	0.90829	0.22928	0.97884	0.74074	0.99647	0.91711	0.99647	0.91711	1	0.95238	2961	1382	1uf7;XRAY
PF00797	0.99145	0.89744	0.96296	0.61254	0.96154	0.59829	0.99003	0.88319	0.99715	0.95442	0.99145	0.89744	310	115	1e2t;XRAY
PF00809	0.9372	0.33816	0.88164	0	0.92512	0.41063	0.94686	0.43478	0.95411	0.50725	0.95652	0.5314	1730	437	1aj0;XRAY
PF00815	0.97561	0.7561	0.89146	0	0.96585	0.65854	0.97439	0.7439	0.98537	0.85366	0.98049	0.80488	833	181	1kae;XRAY
PF00821	0.92894	0.34247	0.83048	0	0.96661	0.65925	0.92979	0.3339	0.96918	0.68493	0.9649	0.64212	284	77	1nhx;XRAY
PF00834	0.98241	0.77889	0.90704	0.32663	0.92462	0.22613	0.95477	0.50251	0.9598	0.55276	0.96357	0.59045	1030	206	1rpx;XRAY
PF00840	0.90896	0.19906	0.74766	0	0.97482	0.73185	0.89813	0.14637	0.96487	0.63232	0.95141	0.49766	224	70	1cel;XRAY
PF00857	0.7956	0.52747	0.92527	0.31868	0.95604	0.54945	0.94286	0.56044	0.87363	0.52747	0.95714	0.6044	2195	1021	1nba;XRAY
PF00871	0.97005	0.6901	0.91094	0.26563	0.93594	0.5	0.96146	0.60417	0.96615	0.66146	0.96354	0.625	963	356	1g99;XRAY
PF00881	0.65761	0.14493	0.93478	0.32609	0.61775	0	0.85145	0.21739	0.65217	0.09058	0.78442	0.21739	2915	1202	1ylu;XRAY
PF00882	0.93004	0.28807	0.99588	0.9465	1	0.98765	0.97119	0.69959	0.97531	0.74074	0.97942	0.78189	163	20	1ah7;XRAY
PF00884	0.85026	0.46816	0.9611	0.59897	0.77384	0.26162	0.95284	0.66093	0.86644	0.42341	0.93287	0.54389	3016	1595	1auk;XRAY
PF00885	1	0.97902	0.86014	0	0.87413	0	1	0.97902	1	0.97902	1	0.97902	870	178	1rvv;XRAY
PF00890	0.92262	0.27381	0.98869	0.8869	0.94702	0.47024	0.99345	0.93452	0.95893	0.58929	0.99226	0.92262	2568	665	1d4c;XRAY
PF00891	0.98367	0.81633	0.83673	0	0.98367	0.81633	0.98367	0.81633	0.99592	0.93878	0.98776	0.85714	933	446	1kyw;XRAY
PF00903	0.8951	0	1	0.97902	0.34266	0	1	0.97902	0.83916	0	0.97203	0.6993	7832	3154	1fro;XRAY
PF00905	1	0.98712	0.92275	0.21459	1	0.98712	1	0.98712	1	0.98712	1	0.98712	5165	1407	1m6k;XRAY
PF00908	0.97701	0.74713	0.78161	0	0.81609	0.25862	0.95402	0.51724	0.95977	0.57471	0.95402	0.51724	825	262	1dzr;XRAY
PF00923	0.96868	0.65996	0.82103	0.05593	0.98098	0.783	0.96644	0.63758	0.9821	0.79418	0.97763	0.74944	1011	344	1onr;XRAY
PF00926	0.90758	0.40284	0.87915	0.30016	0.86809	0.15008	0.93839	0.43444	0.94629	0.53712	0.93286	0.38705	988	142	1snn;XRAY
PF00929	0.99714	0.94286	0.90857	0.4	0.98857	0.85714	1	0.97143	1	0.97143	1	0.97143	3077	1041	1w0h;XRAY
PF00962	0.9306	0.6791	0.94851	0.47015	0.98433	0.82836	0.95448	0.67164	0.96194	0.6791	0.9694	0.6791	800	304	1a4l;XRAY
PF00975	0.94539	0.50971	0.97451	0.71602	0.87015	0.4733	0.97573	0.72816	0.96966	0.66748	0.9733	0.70388	39	37	1kez;XRAY
PF00977	0.99559	0.92511	0.92952	0.48458	0.81278	0	0.97137	0.68282	0.98458	0.81498	0.96916	0.66079	1578	334	2a0n;XRAY
PF00982	0.9574	0.56054	0.9843	0.8296	0.98991	0.88565	0.99103	0.89686	0.98655	0.85202	0.99439	0.93049	572	160	1uqt;XRAY
PF01028	0.97465	0.73703	0.73349	0.42453	0.82429	0.18868	0.95991	0.71934	0.97995	0.79009	0.95873	0.73113	167	31	1a41;XRAY
PF01039	0.79235	0	0.99184	0.91837	0.93112	0.47449	0.96735	0.67347	0.90867	0.18878	0.97092	0.70918	1259	200	1xny;XRAY
PF01041	0.98082	0.79452	0.89406	0.47489	0.9379	0.38356	0.98082	0.79452	0.99178	0.90411	0.98813	0.86758	1643	776	1b9h;XRAY
PF01048	0.62343	0.43933	0.50837	0	0.80126	0.02092	0.64854	0.1046	0.75105	0.41841	0.70921	0.25105	2510	891	1cg6;XRAY
PF01053	0.99217	0.91384	0.92428	0.40035	0.95561	0.5483	0.98869	0.87903	0.99913	0.98346	0.99217	0.91384	2421	597	1qgn;XRAY
PF01058	0.50955	0	0.87261	0	0.92357	0.19108	0.86624	0	0.86624	0	0.89172	0	1476	216	1cc1;XRAY
PF01063	0.76316	0.4386	0.86404	0.2193	0.92836	0.38012	0.93275	0.35088	0.87865	0.45322	0.94152	0.39474	2046	720	1daa;XRAY
PF01068	0.98661	0.84821	1	0.98214	0.98214	0.80357	1	0.98214	0.99107	0.89286	1	0.98214	977	499	1a0i;XRAY
PF01070	0.9792	0.77064	0.88135	0.32416	0.86361	0.44037	0.96514	0.62997	0.97187	0.69725	0.96758	0.65443	1033	380	1fcb;XRAY
PF01077	0.95076	0.49242	0.81439	0	0.98106	0.79545	0.95076	0.49242	0.97727	0.75758	0.97727	0.75758	2439	687	1aop;XRAY
PF01081	0.98196	0.79897	0.9201	0.20619	0.95361	0.51546	0.98196	0.79897	0.97938	0.7732	0.98711	0.85052	695	250	1fq0;XRAY
PF01083	0.96238	0.61386	0.96931	0.69307	0.9505	0.60396	0.97921	0.78218	0.96931	0.68317	0.97822	0.77228	273	120	1bs9;XRAY
PF01088	0.96053	0.60526	0.96711	0.67105	0.91974	0.34211	0.99342	0.93421	0.98158	0.81579	0.99474	0.94737	340	140	1cmx;XRAY
PF01095	0.97288	0.71186	0.96186	0.69492	0.92458	0.55932	0.98475	0.83051	0.98051	0.78814	0.9822	0.80508	523	205	1gq8;XRAY
PF01112	0.98016	0.75397	0.93056	0.43651	0.89484	0.37698	0.9623	0.5754	0.96429	0.59524	0.95635	0.59524	387	174	1apy;XRAY
PF01116	0.95972	0.59416	0.9708	0.70493	0.92145	0.62437	0.97986	0.79557	0.97382	0.73515	0.97784	0.77543	1046	164	1b57;XRAY
PF01126	0.78713	0	0.9604	0.59406	0.96782	0.66832	0.93069	0.29703	0.87624	0	0.93069	0.29703	281	129	1wnw;XRAY
PF01129	0.69617	0	0.29785	0	0.59809	0.07177	0.49761	0	0.67225	0	0.5622	0	82	27	1og1;XRAY
PF01135	0.81604	0	0.99528	0.9434	0.95755	0.56604	0.98585	0.84906	0.89151	0	0.96698	0.66038	716	313	1dl5;XRAY
PF01149	0.98498	0.84084	0.92793	0.6006	0.97297	0.72072	0.98799	0.87087	0.99399	0.93093	0.99399	0.93093	871	316	1k82;XRAY
PF01156	0.97453	0.74197	0.97785	0.77519	0.97564	0.75305	0.98339	0.83056	0.97896	0.78627	0.98339	0.83056	784	337	1mas;XRAY
PF01168	0.98611	0.83333	0.99306	0.90278	0.97917	0.76389	0.99769	0.94907	0.99537	0.92593	0.99537	0.92593	2163	914	1bd0;XRAY
PF01177	0.98678	0.82933	0.86659	0.3726	0.97236	0.6851	0.98438	0.80529	0.99519	0.91346	0.98798	0.84135	1557	664	1b73;XRAY
PF01179	0.94601	0.44601	0.94131	0.39906	0.6338	0	0.95775	0.56338	0.94836	0.46948	0.93662	0.35211	264	73	1oac;XRAY
PF01180	0.87543	0.23891	0.95137	0.50341	0.94454	0.47782	0.94795	0.46928	0.93345	0.39249	0.95734	0.56314	1061	348	1d3g;XRAY
PF01182	0.76994	0.17241	0.23491	0	0.76616	0.10776	0.51832	0.0431	0.82435	0.34483	0.66595	0.10776	4	3	1cd5;XRAY
PF01188	0.94845	0.41237	0.92784	0.20619	0.91753	0.15464	0.96392	0.56701	0.96392	0.56701	0.96392	0.56701	1681	671	1muc;XRAY
PF01195	0.98352	0.82418	0.98718	0.86081	0.97802	0.76923	0.98535	0.84249	0.98352	0.82418	0.98535	0.84249	820	283	2pth;XRAY
PF01208	0.94783	0.46377	0.87826	0.24638	0.91739	0.2029	0.95652	0.55072	0.94348	0.42029	0.96812	0.66667	850	198	1uro;XRAY
PF01212	0.65712	0.52951	0.97743	0.76389	0.78646	0	0.92969	0.64236	0.76215	0.30382	0.89497	0.65104	774	264	1ax4;XRAY
PF01220	0.96852	0.64815	0.47161	0.08642	0.74198	0.07407	0.91852	0.51852	0.94938	0.48148	0.94074	0.59259	680	142	1uqr;XRAY
PF01223	0.97822	0.73702	0.88777	0.31826	0.98325	0.78727	0.9732	0.68677	0.9799	0.75377	0.9866	0.82077	481	252	1smn;XRAY
PF01227	0.8932	0	0.85437	0.09709	0.85437	0.24272	0.91748	0.19417	0.93689	0.33981	0.93204	0.29126	1350	283	1gtp;XRAY
PF01230	0.96491	0.59649	0.66667	0	0.87368	0.10526	0.97193	0.66667	0.9614	0.5614	0.97193	0.66667	1798	621	5fit;XRAY
PF01238	0.95299	0.52991	0.88205	0.17094	0.91709	0.34188	0.96581	0.65812	0.9735	0.73504	0.96923	0.69231	483	223	1pmi;XRAY
PF01242	0.93284	0.33582	0.91604	0.16791	0.7444	0.03731	0.95522	0.52239	0.92724	0.35448	0.93657	0.37313	583	185	1b66;XRAY
PF01244	0.97393	0.72086	0.97546	0.7362	0.93098	0.29141	0.98926	0.87423	0.98006	0.78221	0.9862	0.84356	474	218	1itq;XRAY
PF01255	0.87875	0.3875	0.93875	0.5125	0.89	0.075	0.925	0.4	0.91375	0.525	0.93125	0.45	1042	324	1f75;XRAY
PF01261	0.55293	0.21396	0.93468	0.39414	0.50563	0	0.88514	0.3491	0.52928	0.21396	0.81081	0.29279	2908	1464	2xis;XRAY
PF01263	0.97003	0.67823	0.97161	0.69401	0.97161	0.69401	0.9858	0.83596	0.97634	0.74132	0.9858	0.83596	1066	520	1snz;XRAY
PF01266	0.84058	0	1	0.98551	0.75072	0	0.9971	0.95652	0.8087	0	0.97101	0.69565	5310	2168	1c0k;XRAY
PF01268	0.90785	0.06387	0.56934	0	0.90328	0.01825	0.87226	0	0.94343	0.41971	0.93431	0.32847	1057	88	1eg7;XRAY
PF01274	0.9208	0.16892	0.87312	0.37162	0.92868	0.47673	0.9726	0.71697	0.97185	0.70946	0.97297	0.72072	16	10	1d8c;XRAY
PF01276	0.97453	0.7278	0.72999	0	0.97671	0.74964	0.97016	0.68413	0.99272	0.90975	0.98763	0.85881	567	173	1ord;XRAY
PF01278	0.91884	0.2637	0.98356	0.82877	0.91301	0.5274	0.97329	0.72603	0.9637	0.63014	0.9774	0.76712	45	11	1i78;XRAY
PF01288	0.94882	0.43307	0.90157	0.15748	0.80709	0.15748	0.94882	0.43307	0.92913	0.23622	0.94882	0.43307	888	347	1hka;XRAY
PF01293	0.92928	0.29851	0.9538	0.51883	0.96162	0.59702	0.97512	0.73205	0.97299	0.71073	0.97939	0.7747	482	50	1aq2;XRAY
PF01327	0.90816	0.27211	0.94388	0.4932	0.93878	0.34014	0.94898	0.45918	0.95238	0.5102	0.95918	0.54422	1321	350	1bs4;XRAY
PF01328	0.53983	0.41525	0.87288	0.22034	0.54746	0	0.73051	0.45763	0.65254	0.32203	0.68644	0.42373	6	5	2cpo;XRAY
PF01329	0.99457	0.92391	0.70109	0	0.95109	0.5163	0.97554	0.7337	0.99457	0.92391	0.99457	0.92391	552	238	1dco;XRAY
PF01339	0.95843	0.61798	0.94382	0.65169	0.96854	0.70787	0.98652	0.82022	0.98427	0.79775	0.98989	0.85393	930	384	1chd;XRAY
PF01341	0.95685	0.56855	0.94839	0.48387	0.94597	0.45968	0.97258	0.72581	0.97258	0.72581	0.96855	0.68548	147	51	1qk2;XRAY
PF01344	0.22222	0	0.35556	0	0.82222	0	0.2	0	0.18889	0	0.26667	0	7083	2699	1gog;XRAY
PF01361	0.76023	0.5848	0.77193	0.17544	0.40351	0.11696	0.88889	0.2924	0.79532	0.2924	0.87719	0.2924	639	221	1bjp;XRAY
PF01364	0.9029	0.44928	0.76377	0	0.82464	0.48551	0.84855	0.42029	0.92029	0.54348	0.90797	0.58696	20	8	1cvr;XRAY
PF01370	0.90331	0.60976	0.94164	0.39199	0.85453	0.20035	0.95993	0.69686	0.93118	0.63589	0.95645	0.69686	8830	3607	1qrr;XRAY
PF01373	0.84679	0	0.8848	0	0.72803	0	0.92755	0.27316	0.85629	0.26128	0.88717	0.16627	133	40	1bya;XRAY
PF01374	0.94286	0.42857	0.89524	0.40476	0.75	0	0.97143	0.71429	0.97619	0.7619	0.96905	0.69048	32	7	1chk;XRAY
PF01400	0.9375	0.375	0.93125	0.40625	0.93438	0.4375	0.95312	0.53125	0.9625	0.625	0.95938	0.59375	460	231	1ast;XRAY
PF01401	0.88313	0.25659	0.89525	0.22496	0.93814	0.38664	0.94446	0.50967	0.94938	0.49209	0.9536	0.52021	141	47	1o8a;XRAY
PF01408	0.98387	0.80645	0.99194	0.8871	1	0.96774	1	0.96774	0.98387	0.80645	1	0.96774	3572	1861	1ofg;XRAY
PF01425	0.95104	0.62907	0.98451	0.84289	0.94019	0.63217	0.99194	0.91726	0.95971	0.67865	0.9842	0.83979	2643	1202	1mt5;XRAY
PF01427	0.9425	0.425	0.9275	0.275	0.945	0.45	0.955	0.55	0.955	0.55	0.955	0.55	251	109	1r44;XRAY
PF01432	0.98218	0.80178	0.99332	0.91314	0.96437	0.62361	0.99666	0.94655	0.98998	0.87973	0.9922	0.902	1367	442	1i1i;XRAY
PF01433	0.97711	0.76007	0.82051	0.02747	0.94231	0.49451	0.96795	0.6685	0.9826	0.81502	0.9707	0.69597	1348	607	1h19;XRAY
PF01447	0.96599	0.61224	0.91837	0.13605	0.98639	0.81633	0.95918	0.54422	0.97279	0.68027	0.97279	0.68027	381	105	1tlp;XRAY
PF01451	0.96959	0.67568	0.85304	0.25338	0.96115	0.64189	0.99493	0.89527	0.97804	0.72635	0.99662	0.91216	1443	619	1d1q;XRAY
PF01467	0.82415	0.3937	0.3937	0	0.72703	0.28871	0.67717	0.31496	0.88976	0.41995	0.70866	0.44619	2579	997	1b6t;XRAY
PF01470	0.95391	0.66288	0.94444	0.41667	0.95076	0.4798	0.96717	0.65657	0.97096	0.66919	0.97475	0.70707	251	102	1aug;XRAY
PF01487	0.95704	0.56296	0.9837	0.81481	0.93481	0.32593	0.97926	0.77037	0.96444	0.62222	0.97037	0.68148	301	133	1qfe;XRAY
PF01494	0.38253	0	0.75573	0	0.60305	0	0.61154	0	0.45293	0	0.60645	0	2637	1483	1foh;XRAY
PF01501	0.92204	0.33602	0.95565	0.53763	0.80511	0.16129	0.94355	0.43011	0.89919	0.37634	0.92339	0.44355	894	364	1ga8;XRAY
PF01504	0.96218	0.58824	0.91176	0.39916	0.92647	0.48319	0.96008	0.56723	0.96429	0.60924	0.96429	0.60924	367	131	1bo1;XRAY
PF01510	0.84783	0.07246	0.85507	0.28986	0.72464	0.21739	0.88043	0	0.90942	0.14493	0.87319	0.07246	1323	485	1lba;XRAY
PF01532	0.96653	0.64854	0.96444	0.62762	0.92782	0.37657	0.97333	0.71653	0.97123	0.69561	0.9681	0.66423	333	134	1dl2;XRAY
PF01546	0.98092	0.78563	0.86756	0.21324	0.97475	0.72391	0.98934	0.86981	0.97924	0.7688	0.98653	0.84175	4966	2128	1cg2;XRAY
PF01547	0.73498	0	0.99117	0.90106	0.4894	0	0.98763	0.86572	0.61661	0	0.95053	0.4947	6710	3410	2thi;XRAY
PF01553	0.99684	0.91772	0.89241	0	0.85443	0.12658	0.99684	0.91772	0.98418	0.79114	0.99051	0.85443	3454	1243	1k30;XRAY
PF01555	0.8578	0.4893	0.99235	0.88685	0.98624	0.82569	0.9159	0.58104	0.92966	0.58104	0.95719	0.58104	952	493	1boo;XRAY
PF01565	0.47143	0	0.86429	0	0.27143	0	0.86429	0	0.52143	0	0.77143	0	4323	1598	1dii;XRAY
PF01569	0.86269	0.66062	0.90026	0.20725	0.89249	0.27202	0.95207	0.60881	0.95078	0.66062	0.9443	0.5829	2199	988	1qi9;XRAY
PF01575	0.95975	0.61441	0.89407	0.27542	0.96186	0.55085	0.96398	0.63559	0.97246	0.69915	0.97034	0.63559	1530	697	1s9c;XRAY
PF01593	0.7415	0	0.97959	0.79365	0.52381	0	0.95465	0.54422	0.63492	0	0.88662	0	1904	1163	1b5q;XRAY
PF01596	0.91908	0.17341	0.79191	0	0.72254	0	0.93064	0.28902	0.91908	0.17341	0.92486	0.23121	742	346	1vid;XRAY
PF01625	0.83015	0.42463	0.87261	0.31847	0.67941	0.48832	0.96178	0.57325	0.77495	0.53079	0.92144	0.44586	1279	336	1ff3;XRAY
PF01630	0.92686	0.29773	0.7877	0.26537	0.87832	0.31068	0.9301	0.29773	0.96117	0.58252	0.94951	0.46602	94	36	1fcq;XRAY
PF01636	0.97899	0.7563	0.94958	0.46218	0.93487	0.46218	0.97899	0.7563	0.97269	0.69328	0.97899	0.7563	2854	1681	1l8t;XRAY
PF01640	0.99003	0.86379	0.89701	0.4485	0.81229	0.46512	0.98837	0.8804	0.99003	0.89701	0.98505	0.84718	26	13	1dki;XRAY
PF01641	0.90924	0.42017	0.81176	0.31933	0.92605	0.47059	0.89916	0.36975	0.9563	0.52101	0.92269	0.40336	1066	198	1l1d;XRAY
PF01648	0.95588	0.44118	0.67647	0	0.85294	0	0.95588	0.44118	0.98529	0.73529	0.97059	0.58824	1372	617	1f7l;XRAY
PF01653	0.96417	0.61889	0.96824	0.65961	0.95603	0.53746	0.98697	0.84691	0.98453	0.82248	0.99023	0.87948	848	266	1dgs;XRAY
PF01656	0.9061	0.60976	0.88902	0.35366	0.76341	0.46341	0.94024	0.63415	0.86463	0.62195	0.90854	0.59756	3940	1737	1dae;XRAY
PF01670	0.96	0.6	0.94	0.4	0.84667	0	0.97333	0.73333	0.96	0.6	0.96667	0.66667	131	60	2nlr;XRAY
PF01674	0.85535	0.38994	0.77987	0.40252	0.73962	0.25157	0.93082	0.31447	0.87421	0.28931	0.91447	0.27673	105	67	1r4z;XRAY
PF01678	0.9883	0.84795	0.83918	0	0.89181	0.08772	0.97953	0.76023	0.9883	0.84795	0.97368	0.70175	1380	430	1bwz;XRAY
PF01729	0.96768	0.64646	0.93333	0.40404	0.90505	0.24242	0.97172	0.68687	0.97576	0.72727	0.97576	0.72727	823	208	1qpr;XRAY
PF01739	0.96842	0.68421	0.83158	0.39474	0.81053	0	0.96842	0.68421	0.95789	0.57895	0.96316	0.63158	983	442	1af7;XRAY
PF01746	0.70558	0	0.81726	0	0.48223	0	0.7868	0	0.67513	0	0.71574	0	865	207	1uam;XRAY
PF01747	0.98726	0.85987	0.90127	0.29724	0.87898	0.25478	0.9862	0.84926	0.99363	0.92357	0.98408	0.82803	331	70	1j70;XRAY
PF01751	0.93985	0.48872	0.99248	0.90226	0.91729	0.18797	0.97744	0.75188	0.95113	0.48872	0.97368	0.71429	4982	765	1d6m;XRAY
PF01761	0.99379	0.93168	0.92236	0.21739	0.95963	0.59006	0.99379	0.93168	0.99379	0.93168	0.99379	0.93168	996	344	1dqs;XRAY
PF01791	0.53846	0	0.84615	0.19943	0.31909	0	0.80484	0	0.44872	0	0.72934	0	929	589	1p1x;XRAY
PF01812	0.99375	0.9375	0.90625	0.0625	0.91875	0.1875	0.98125	0.8125	1	1	0.975	0.75	857	448	1u3f;XRAY
PF01817	0.99275	0.7971	0.98551	0.72464	0.68116	0	1	0.86957	1	0.86957	1	0.86957	1070	316	3csm;XRAY
PF01820	0.96739	0.65217	0.91304	0.1087	0.94565	0.43478	0.97826	0.76087	0.98913	0.86957	0.98913	0.86957	898	217	2dln;XRAY
PF01828	0.96538	0.62821	0.9641	0.61538	0.97692	0.74359	0.96923	0.66667	0.97692	0.74359	0.97949	0.76923	39	19	1s2k;XRAY
PF01844	0.84127	0.31746	0.70635	0	0.61905	0	0.80159	0.31746	0.8254	0.39683	0.77778	0.39683	1736	632	1fr2;XRAY
PF01853	0.95946	0.56757	0.89189	0	0.92973	0.27027	0.98919	0.86486	0.98919	0.86486	0.99189	0.89189	278	61	1mj9;XRAY
PF01862	0.99099	0.9009	0.88288	0	0.92793	0.27027	0.96396	0.63063	0.99099	0.9009	0.98198	0.81081	76	27	1mt1;XRAY
PF01880	0.84685	0	0.94595	0.45045	0.82883	0	0.91441	0.13514	0.88739	0	0.90991	0.09009	93	53	1do6;XRAY
PF01915	0.99057	0.89623	0.69811	0	0.71698	0	0.98585	0.84906	0.97642	0.75472	0.9717	0.70755	1133	563	1ex1;XRAY
PF01916	0.94837	0.46016	0.88328	0.29181	0.86532	0.10101	0.95174	0.49383	0.95174	0.49383	0.94725	0.44893	253	72	1roz;XRAY
PF01979	0.6039	0	0.66558	0	0.48133	0	0.66234	0	0.54708	0	0.60471	0	3824	1915	1kra;XRAY
PF02089	0.89506	0.52471	0.88517	0.31939	0.76882	0.15209	0.92471	0.45627	0.90038	0.54753	0.92167	0.47148	117	50	1pja;XRAY
PF02102	0.91571	0.24286	0.76	0	0.73143	0.05714	0.87714	0.25714	0.90857	0.31429	0.87143	0.25714	57	29	1eb6;XRAY
PF02126	0.4787	0.27157	0.95634	0.55378	0.8541	0.66028	0.83813	0.28754	0.71565	0.28754	0.83919	0.36209	137	44	1ez2;XRAY
PF02136	0.54354	0.33033	0.67267	0.06006	0.55556	0	0.63363	0.33033	0.52853	0.33033	0.61261	0.27027	407	150	1vzz;XRAY
PF02142	0.70337	0.08989	0.80449	0.13483	0.6427	0	0.85618	0.20225	0.71011	0.13483	0.83371	0.11236	1977	394	1b93;XRAY
PF02146	0.90985	0.36669	0.85562	0.13751	0.80825	0.12223	0.93125	0.40489	0.90222	0.3285	0.9152	0.37433	1039	361	1szd;XRAY
PF02152	0.97368	0.70175	0.89035	0.35088	0.85526	0	0.98684	0.83333	0.98246	0.78947	0.98246	0.78947	854	293	2dhn;XRAY
PF02222	0.91384	0.15537	0.95904	0.55085	0.95056	0.4661	0.97599	0.72034	0.95056	0.49435	0.97599	0.72034	1112	229	1ez1;XRAY
PF02230	0.89906	0.64151	0.93585	0.66981	0.94245	0.41509	0.96038	0.62264	0.95755	0.63208	0.96226	0.63208	845	479	1auo;XRAY
PF02233	0.92803	0.24621	0.95265	0.49242	0.85417	0.32197	0.96212	0.58712	0.9375	0.39773	0.94886	0.49242	487	62	1djl;XRAY
PF02237	0.5	0	0.95652	0.43478	0.54348	0	0.86957	0	0.43478	0	0.78261	0	618	291	1bib;XRAY
PF02253	0.9416	0.42023	0.9943	0.92593	0.98575	0.84046	0.98575	0.84046	0.96866	0.66952	0.9886	0.86895	177	78	1qd6;XRAY
PF02255	0.97554	0.7337	0.875	0.16304	0.98098	0.78804	0.96196	0.59783	0.98641	0.84239	0.9837	0.81522	457	88	1e2a;XRAY
PF02261	1	0.89888	0.77528	0	0.77528	0	1	0.89888	1	0.89888	0.97753	0.67416	419	62	1aw8;XRAY
PF02265	0.84791	0	0.91255	0.11407	0.92395	0.22814	0.90494	0.03802	0.92015	0.19011	0.91635	0.15209	134	73	1ak0;XRAY
PF02267	0.8251	0.18519	0.92181	0.20576	0.89918	0.47325	0.9177	0.32922	0.88477	0.20576	0.9465	0.45267	32	17	1r16;XRAY
PF02273	0.85123	0.34331	0.07923	0	0.88028	0.21127	0.5493	0	0.94366	0.42254	0.76761	0.28169	4	2	1tht;XRAY
PF02275	0.96885	0.67891	0.95128	0.50319	0.96645	0.65495	0.98003	0.79073	0.98323	0.82268	0.98083	0.79872	316	147	3pva;XRAY
PF02277	0.9823	0.79646	0.9292	0.26549	0.94985	0.47198	0.9823	0.79646	0.9882	0.85546	0.98525	0.82596	485	214	1d0s;XRAY
PF02310	0.984	0.8	0.944	0.4	0.948	0.44	0.992	0.88	0.98	0.76	0.992	0.88	1803	751	1be1;NMR
PF02329	0.86842	0	0.63158	0.46053	0.82895	0	0.76316	0.46053	0.80921	0	0.82895	0.46053	18	7	1pya;XRAY
PF02350	0.96243	0.60694	0.94147	0.52746	0.9776	0.75867	0.96821	0.66474	0.98266	0.80925	0.97688	0.75145	836	275	1f6d;XRAY
PF02388	0.51698	0	0.71991	0.0463	0.60494	0	0.66127	0	0.58102	0	0.65509	0	261	44	1p4n;XRAY
PF02423	0.39577	0	0.98371	0.81433	0.59121	0	0.87622	0.27687	0.50651	0	0.80456	0.22801	610	295	1x7d;XRAY
PF02431	0.73138	0.15957	0.80186	0.19947	0.78059	0	0.78723	0.23936	0.78989	0.15957	0.80984	0.22606	140	52	1eyp;XRAY
PF02435	0.942	0.41763	0.99459	0.94354	0.98531	0.85073	0.98531	0.85073	0.98531	0.85073	0.98608	0.85847	82	19	1oyg;XRAY
PF02441	1	1	0.93333	0.33333	0.375	0	1	1	0.99167	0.91667	1	1	1507	399	1mvn;XRAY
PF02446	0.96281	0.61983	0.98898	0.88154	0.99105	0.9022	0.9814	0.80579	0.98416	0.83333	0.98691	0.86088	500	199	1cwy;XRAY
PF02502	0.89706	0.40441	0.89522	0.07353	0.5864	0	0.95404	0.49632	0.88051	0.33088	0.92831	0.38603	753	165	1nn4;XRAY
PF02515	0.54909	0.22831	0.92009	0.22831	0.24315	0	0.85731	0.45662	0.45434	0.17123	0.70776	0.45662	1921	726	1t4c;XRAY
PF02518	0.925	0.25	0.945	0.45	0.735	0	0.96	0.6	0.935	0.35	0.955	0.55	30793	12937	1l0o;XRAY
PF02525	0.7267	0.31596	0.48025	0	0.51501	0	0.68878	0.04739	0.75829	0.28436	0.703	0	1195	577	1d4a;XRAY
PF02560	0.92708	0.24306	0.34028	0	0.73611	0	0.68056	0	0.93056	0.27778	0.79167	0	153	12	1dw9;XRAY
PF02570	0.995	0.95	0.675	0	0.805	0	0.91	0.1	0.935	0.35	0.915	0.15	353	105	1f2v;XRAY
PF02572	0.88623	0.20958	0.98204	0.77844	0.98802	0.83832	0.97904	0.7485	0.95509	0.50898	0.98503	0.80838	567	133	1g64;XRAY
PF02580	0.97381	0.7381	0.81667	0	0.9	0.09524	0.9619	0.61905	0.96667	0.66667	0.9619	0.61905	638	156	1j7g;XRAY
PF02581	0.94659	0.46041	0.94843	0.53407	0.82505	0.07366	0.99448	0.93923	0.9558	0.55249	0.97974	0.7919	1023	419	2tps;XRAY
PF02615	1	0.99698	1	0.99698	0.88822	0	1	0.99698	0.99698	0.96677	1	0.99698	380	165	1s20;XRAY
PF02633	0.92262	0.39683	0.90675	0.39683	0.90278	0.2381	0.93254	0.43651	0.95437	0.53571	0.95437	0.53571	325	176	1j2u;XRAY
PF02668	0.93796	0.36496	0.92336	0.21898	0.77007	0	0.94526	0.43796	0.92701	0.25547	0.93796	0.36496	1039	479	1os7;XRAY
PF02685	0.98548	0.85484	0.64516	0	0.9	0	0.97097	0.70968	0.98065	0.80645	0.97097	0.70968	391	190	1q18;XRAY
PF02709	0.82456	0.03759	0.70301	0.21303	0.63033	0.25063	0.85338	0.27569	0.82205	0.25063	0.8183	0.26316	143	44	1fr8;XRAY
PF02729	0.98801	0.81535	0.93285	0.26379	0.94484	0.38369	0.9976	0.91127	0.98561	0.79137	0.99281	0.86331	1983	340	1akm;XRAY
PF02779	0.94886	0.45455	0.76989	0	0.9233	0.39773	0.98011	0.76705	0.96875	0.65341	0.98295	0.79545	4047	487	1ni4;XRAY
PF02784	0.99704	0.94815	0.94074	0.38519	0.97926	0.77037	0.98963	0.87407	0.99852	0.96296	0.99407	0.91852	1749	537	7odc;XRAY
PF02797	0.98658	0.80537	0.64765	0	0.9698	0.63758	0.97987	0.73826	0.99664	0.90604	1	0.9396	1327	219	1cgk;XRAY
PF02798	0.61029	0	0.95588	0.44118	0.46324	0	0.88235	0	0.59559	0	0.88235	0	5307	1501	1pd2;XRAY
PF02803	1	0.99174	0.86364	0	0.88843	0.16529	0.99587	0.95041	0.99587	0.95041	0.99587	0.95041	2994	370	1qfl;XRAY
PF02826	0.85371	0.69714	0.54857	0	0.95314	0.50286	0.816	0.51429	0.92343	0.75429	0.89029	0.70857	3786	1300	1gdh;XRAY
PF02866	0.99383	0.92593	0.92901	0.27778	0.99383	0.92593	0.99691	0.95679	0.99383	0.92593	1	0.98765	2052	441	1emd;XRAY
PF02878	0.99237	0.91603	0.97137	0.70611	0.97901	0.78244	1	0.99237	0.99046	0.89695	0.99618	0.9542	2656	510	1p5d;XRAY
PF02896	0.99719	0.95506	0.98596	0.8427	0.98315	0.81461	0.99719	0.95506	0.99719	0.95506	1	0.98315	17	13	1kc7;XRAY
PF02900	1	0.97015	0.95522	0.52239	0.70896	0	0.99254	0.89552	0.99254	0.89552	0.98881	0.85821	629	250	1bou;XRAY
PF02901	0.9645	0.64337	0.96783	0.67665	0.95563	0.55463	0.9817	0.81531	0.98447	0.84304	0.9878	0.87632	506	87	2pfl;XRAY
PF02907	0.76128	0.13889	0.61545	0	0.53299	0	0.69965	0.17361	0.72396	0.12153	0.72049	0.20833	3290	30	1rgq;XRAY
PF02940	0.96059	0.59113	0.93966	0.38177	0.78448	0	0.96305	0.61576	0.96429	0.62808	0.95567	0.54187	62	35	1d8h;XRAY
PF02945	0.87943	0.42553	0.97163	0.67376	0.9539	0.49645	0.92908	0.56738	0.93617	0.6383	0.94326	0.60284	52	35	1e7l;XRAY
PF02962	0.9449	0.49587	0.87879	0.27548	0.79063	0.16529	0.94215	0.41322	0.93388	0.35813	0.93939	0.38567	166	65	1otg;XRAY
PF02979	0.9612	0.56437	0.75309	0	0.99118	0.8642	0.97002	0.65256	0.99118	0.8642	0.99471	0.89947	96	24	2ahj;XRAY
PF02982	0.92839	0.3871	0.73548	0	0.77419	0.11613	0.91871	0.16774	0.94839	0.45161	0.94323	0.4	33	9	1std;XRAY
PF03013	0.8891	0.09398	0.90977	0.43233	0.80451	0.28195	0.94173	0.50752	0.92293	0.30075	0.92669	0.43233	48	13	1vas;XRAY
PF03051	0.98533	0.8465	0.99323	0.92551	0.98815	0.87472	0.99323	0.92551	0.99266	0.91986	0.99492	0.94244	198	67	1gcb;XRAY
PF03071	0.88529	0	0.99118	0.91176	0.98824	0.88235	0.97941	0.79412	0.97059	0.70588	0.98529	0.85294	67	21	1foa;XRAY
PF03098	0.86788	0	0.75171	0	0.4328	0	0.8246	0	0.85194	0	0.75626	0	327	152	1mhl;XRAY
PF03150	0.96078	0.58824	0.56863	0	0.66667	0.03268	0.90196	0.29412	0.94771	0.45752	0.88235	0.29412	536	222	1nml;XRAY
PF03167	0.93168	0.46584	0.83851	0.03106	0.89752	0.06211	0.94099	0.40373	0.93168	0.43478	0.9441	0.43478	69	57	1eug;XRAY
PF03171	0.48148	0	0.13889	0	1	0.92593	0.23148	0	0.76852	0	0.52778	0	3414	939	1qje;XRAY
PF03241	0.49211	0	0.9	0	0.35263	0	0.82632	0	0.51053	0	0.70263	0	179	56	1u8v;XRAY
PF03328	0.98444	0.82222	0.92	0.37778	0.98222	0.8	0.99333	0.91111	0.98444	0.82222	0.99556	0.93333	1131	487	1dxe;XRAY
PF03352	0.87689	0.51136	0.78598	0.11364	0.89583	0.17045	0.9072	0.5303	0.93371	0.54924	0.92424	0.5303	643	222	1p7m;NMR
PF03360	0.7767	0	0.83981	0	0.66505	0	0.84466	0	0.71845	0	0.85437	0	200	35	1kws;XRAY
PF03372	0.99203	0.91633	0.81076	0.11952	0.97908	0.78685	0.99104	0.90637	0.99402	0.93625	0.99303	0.92629	4523	2119	1bix;XRAY
PF03414	0.90071	0.28369	0.49882	0	0.88652	0.22459	0.81678	0.30733	0.93381	0.46099	0.90071	0.40189	209	22	1vzx;XRAY
PF03435	0.90888	0.06834	0.99544	0.93394	1	0.9795	0.98405	0.82005	0.96128	0.59226	0.98633	0.84282	698	296	1e5q;XRAY
PF03441	1	0.98485	0.5947	0	0.57828	0	0.97601	0.74495	0.98864	0.87121	0.97096	0.69444	1059	442	1dnp;XRAY
PF03446	0.87861	0	0.9422	0.40462	0.92486	0.23121	0.93642	0.34682	0.92486	0.23121	0.94798	0.46243	2587	790	2pgd;XRAY
PF03572	0.8366	0.23965	0.86492	0.13072	0.78867	0.06536	0.94553	0.58824	0.83878	0.13072	0.94336	0.56645	2364	508	1k32;XRAY
PF03575	0.97143	0.71429	0.95857	0.65714	0.97	0.7	0.97857	0.78571	0.98286	0.82857	0.98	0.8	281	136	1fy2;XRAY
PF03576	0.90934	0.34639	0.98313	0.8253	0.90904	0.15663	0.98855	0.87952	0.92831	0.42169	0.98675	0.86145	282	136	1b65;XRAY
PF03590	0.92986	0.17361	0.6875	0.01389	0.91111	0.44444	0.90833	0.25	0.95972	0.59722	0.925	0.34722	166	27	12as;XRAY
PF03712	0.96732	0.65359	1	0.98039	1	0.98039	0.99346	0.91503	0.98693	0.84967	1	0.98039	93	46	1opm;XRAY
PF03718	0.87193	0	0.82895	0	0.8307	0	0.89474	0.16667	0.94123	0.41228	0.90351	0.16667	10	3	1ogo;XRAY
PF03721	0.94293	0.43478	0.94837	0.46196	0.91848	0.48913	0.97826	0.76087	0.95924	0.57065	0.97283	0.70652	1506	401	1dli;XRAY
PF03852	0.97297	0.67568	0.7973	0	0.98649	0.81081	0.97297	0.67568	0.98649	0.81081	0.98649	0.81081	151	72	1cw0;XRAY
PF03900	1	0.9589	0.9863	0.82192	0.9726	0.68493	1	0.9589	1	0.9589	1	0.9589	801	289	2ypn;XRAY
PF03917	0.92355	0.31116	0.9324	0.5794	0.88519	0.24678	0.95708	0.55794	0.94474	0.43455	0.94796	0.48283	10	5	2hgs;XRAY
PF03936	0.71289	0	0.54762	0	0.42857	0	0.69048	0	0.72829	0	0.64566	0	702	211	1di1;XRAY
PF04055	1	1	0.68125	0	0.78125	0.1875	1	1	1	1	1	1	13120	4947	1r30;XRAY
PF04127	0.98851	0.86207	0.93103	0.28736	0.95977	0.57471	0.99425	0.91954	1	0.97701	1	0.97701	876	311	1u7u;XRAY
PF04209	0.98659	0.86585	0.84634	0.36585	0.83537	0	0.97561	0.7561	0.97439	0.7439	0.96585	0.65854	303	78	1ey2;XRAY
PF04389	0.96685	0.66298	0.97238	0.71823	0.96133	0.60773	0.9779	0.77348	0.98343	0.82873	0.97238	0.71823	911	416	1amp;XRAY
PF04828	0.97561	0.73171	0.56098	0	0.96341	0.60976	0.97561	0.73171	1	0.97561	1	0.97561	954	517	1xa8;XRAY
PF04928	0.88793	0	0.93391	0.31609	0.94828	0.45977	0.90805	0.05747	0.88793	0	0.92816	0.25862	164	43	1fa0;XRAY
PF05014	0.978	0.74	0.886	0.2	0.856	0.2	0.966	0.66	0.98	0.76	0.968	0.66	156	91	1f8x;XRAY
PF05067	0.79592	0	0.97551	0.73469	0.8898	0	0.93878	0.36735	0.85714	0	0.93469	0.32653	186	55	1o9i;XRAY
PF05173	0.96667	0.62963	0.98519	0.81481	0.92593	0.37037	0.98889	0.85185	0.98889	0.85185	0.98889	0.85185	764	143	1arz;XRAY
PF05175	0.9863	0.82192	0.77397	0.06849	0.9863	0.82192	0.99315	0.89041	0.9863	0.82192	0.9863	0.82192	2270	836	1vq1;XRAY
PF05191	0.90909	0.10101	0.78788	0.30303	0.62626	0	0.91919	0.40404	0.89899	0.20202	0.94949	0.50505	1008	101	1zio;XRAY
PF05199	0.95357	0.53571	0.71786	0	0.62857	0	0.975	0.75	0.91071	0.5	0.96429	0.64286	1315	513	1gal;XRAY
PF05201	1	0.97015	0.70896	0.33582	0.84328	0.44776	0.96642	0.63433	0.97761	0.74627	0.95896	0.5597	612	193	1gpj;XRAY
PF05221	0.86225	0.43537	0.77755	0.09184	0.82823	0.44898	0.95204	0.52041	0.86156	0.53742	0.90306	0.60884	632	79	1b3r;XRAY
PF05222	0.79487	0.05128	0.84359	0	0.73846	0.33333	0.85897	0.30769	0.80256	0	0.86667	0.28205	1086	222	1pjb;XRAY
PF05409	0.98426	0.84259	0.9	0.05556	0.97037	0.7037	0.98889	0.88889	0.99259	0.92593	0.9963	0.96296	168	8	2bx4;XRAY
PF05426	0.94679	0.46185	0.98795	0.87349	0.92068	0.31125	0.97992	0.79317	0.96084	0.60241	0.97992	0.79317	35	12	1qaz;XRAY
PF05448	0.97997	0.79327	0.97356	0.72917	0.88862	0.40064	0.98878	0.88141	0.98718	0.86538	0.99038	0.89744	110	66	1odt;XRAY
PF06002	0.91841	0.39749	0.68619	0.14644	0.78347	0.08368	0.86088	0.44979	0.91632	0.58577	0.88808	0.50209	54	8	1ro7;XRAY
PF06134	0.90032	0.2502	0.76917	0	0.9548	0.54076	0.94673	0.46005	0.95884	0.58111	0.96287	0.62147	81	14	1de6;XRAY
PF06441	1	1	0.9625	0.625	0.95	0.5	1	1	1	1	1	1	242	65	1ehy;XRAY
PF06442	0.70982	0	0.10268	0	0.76786	0	0.39286	0	0.76786	0	0.50893	0	3	1	1vie;XRAY
PF06941	0.97266	0.71615	0.97656	0.75521	0.96094	0.59896	0.99479	0.9375	0.98958	0.88542	0.99479	0.9375	51	26	1q91;XRAY
PF07714	0.78947	0.09398	0.95113	0.48872	0.96053	0.58271	0.88158	0.39474	0.85714	0.26316	0.90414	0.41353	3770	1296	1ir3;XRAY
PF07722	0.99052	0.90047	0.96682	0.66351	0.99289	0.92417	1	0.99526	1	0.99526	1	0.99526	552	206	1l9x;XRAY
PF07732	0.81197	0	0.82906	0	1	0.94017	0.92308	0.17094	0.88889	0	0.93162	0.25641	1639	474	1nid;XRAY
PF07736	0.94444	0.38462	0.93162	0.25641	0.96581	0.59829	0.91453	0.08547	0.96581	0.59829	0.96581	0.59829	122	48	1dbf;XRAY
PF07745	0.95795	0.5641	0.96923	0.67692	0.96205	0.60513	0.96718	0.65641	0.96923	0.67692	0.97231	0.70769	96	50	1fob;XRAY
PF07823	0.82874	0.57471	0.97471	0.72414	0.94368	0.54023	0.91954	0.71264	0.9023	0.67816	0.93333	0.71264	28	21	1jh6;XRAY
PF07832	0.92376	0.2305	0.97872	0.78014	0.85461	0	0.95745	0.56738	0.93617	0.35461	0.9539	0.53191	6	4	1cfr;XRAY
PF07858	0.94454	0.40336	0.90588	0.2521	0.7916	0.21849	0.93445	0.35294	0.94622	0.38655	0.93109	0.38655	57	36	1nww;XRAY
PF07882	0.98611	0.86111	0.87778	0	0.92222	0.22222	0.96667	0.66667	0.98333	0.83333	0.98889	0.88889	130	36	1fui;XRAY
PF07969	0.60462	0	0.79385	0.2	0.84769	0	0.78462	0	0.76923	0	0.82308	0	1279	628	1ra0;XRAY
PF07977	0.87937	0.25397	0.94444	0.49206	0.94762	0.55556	0.93968	0.49206	0.93175	0.34921	0.94127	0.42857	1294	327	1mka;XRAY
PF07992	0.73013	0	0.97185	0.71192	0.6606	0	0.94371	0.43046	0.70199	0	0.9255	0.24834	9564	3850	1get;XRAY
PF08240	0.20879	0	0.91209	0.10989	0.20879	0	0.62637	0	0.16484	0	0.30769	0	9270	2799	1guf;XRAY
PF08242	0.65138	0	1	0.91743	0.50459	0	0.94495	0.36697	0.72477	0	0.91743	0.09174	3805	2312	1d2h;XRAY
PF08245	0.93996	0.62112	0.92754	0.39337	0.90062	0.35197	0.97516	0.74534	0.95445	0.64182	0.97516	0.74534	4579	1670	1uag;XRAY
PF08543	0.92325	0.19737	0.96053	0.57018	0.94079	0.37281	0.95395	0.50439	0.95175	0.48246	0.94518	0.41667	954	365	1jxh;XRAY
PF09000	0.91964	0.20833	0.97024	0.65476	0.90179	0.29762	0.96726	0.625	0.9494	0.47619	0.97024	0.65476	17	7	1jch;XRAY
PF09017	0.77362	0.39877	0.21656	0	0.72086	0.11656	0.57301	0.10429	0.82699	0.47239	0.66933	0.22699	18	1	1iu4;XRAY
PF09056	0.91204	0.27778	0.625	0	0.72222	0	0.89352	0.27778	0.92593	0.37037	0.87963	0.32407	26	17	1it4;NMR
PF09113	0.66667	0	0.28655	0	0.97076	0.70175	0.36257	0	0.84795	0	0.76023	0	3	2	1pgs;XRAY
PF09198	0.59459	0	0.5	0	0.40541	0	0.59459	0	0.62162	0	0.45946	0	2	1	1c3j;XRAY
PF09225	0.6461	0	0.61039	0	0.70779	0	0.72078	0	0.71429	0	0.74675	0	4	2	1pvi;XRAY
PF09254	0.89062	0	0.77604	0	0.90625	0.05208	0.85938	0	0.88542	0	0.91146	0.10417	4	4	2fok;XRAY
PF09334	0.89155	0.02817	0.84507	0.12676	0.72817	0.09859	0.92535	0.23944	0.93662	0.35211	0.91408	0.21127	1057	184	1a8h;XRAY
PF09492	0.90681	0.14337	0.97491	0.71685	0.91756	0.41219	0.96237	0.5914	0.92115	0.2509	0.96057	0.57348	62	44	1r76;XRAY
PF09588	0.96552	0.62069	0.9931	0.89655	1	0.96552	1	0.96552	0.97931	0.75862	1	0.96552	247	124	1avq;XRAY
Ave	0.891634	0.484923	0.846579	0.342238	0.856541	0.382653	0.921677	0.574331	0.910375	0.56192	0.926515	0.594337
